1  
2  
3  
4  
5  
6  
7  
8  
9  
10  
11  
12  
13  
14  
15  
16  
17  
18  
19  
20  
21  
22  
23  
24  
25  
26  
27  
28  
29  
30  
31  
32  
33  
34  
35  
36  
37

# Towards a Neurometric-based Construct Validity of Trust

Pin-Hao A. Chen<sup>1,2,3</sup>, Dominic Fareri<sup>4</sup>, Berna Groglu<sup>5,6</sup>, Mauricio R. Delgado<sup>7</sup>, & Luke J. Chang<sup>8</sup>

<sup>1</sup> Department of Psychology

<sup>2</sup> Neurobiology and Cognitive Science Center

<sup>3</sup> Center for Artificial Intelligence and Advanced Robotics

National Taiwan University

Taipei, Taiwan

<sup>4</sup> Gordon F. Derner School of Psychology

Adelphi University

Garden City, NY, 11530

<sup>5</sup> Institute of Psychology

Leiden University

Leiden, The Netherlands

<sup>6</sup> Leiden Institute for Brain and Cognition (LIBC)

Leiden, The Netherlands

<sup>7</sup> Department of Psychology

Rutgers University

Newark, NJ, 07102

<sup>8</sup> Department of Psychological and Brain Sciences

Dartmouth College

Hanover, NH, 03755

\*Corresponding author: [andyphchen@ntu.edu.tw](mailto:andyphchen@ntu.edu.tw) & [luke.j.chang@dartmouth.edu](mailto:luke.j.chang@dartmouth.edu)

Word count: 8547

## 1 Abstract

2 Trust is a nebulous construct central to successful cooperative exchanges and interpersonal  
3 relationships. In this study, we introduce a new approach to establishing construct validity of trust  
4 using “neurometrics”. We develop a whole-brain multivariate pattern capable of classifying  
5 whether new participants will trust a relationship partner in the context of a cooperative  
6 interpersonal investment game (n=40) with 90% accuracy and find that it also generalizes to a  
7 variant of the same task collected in a different country with 82% accuracy (n=17). Moreover, we  
8 establish the convergent and discriminant validity by testing the pattern on eleven separate  
9 datasets (n=496) and find that trust is reliably related to beliefs of safety, inversely related to  
10 negative affect, but unrelated to reward, cognitive control, social perception, and self-referential  
11 processing. Together these results provide support for the notion that the psychological  
12 experience of trust contains elements of beliefs of reciprocation and fear of betrayal aversion.  
13 Contrary to our predictions, we found no evidence that trust is related to anticipated reward. This  
14 work demonstrates how “neurometrics” can be used to characterize the psychological processes  
15 associated with brain-based multivariate representations.

16

## 1 Introduction

2 The foundation of modern society is built upon our ability to successfully conduct cooperative  
3 social exchanges such as strategic coalitions, exchange markets, and systems of governance.  
4 Trust plays a central role in facilitating social exchange<sup>1</sup> based on its ability to reduce transaction  
5 costs and increase information sharing<sup>2</sup>. Successful interpersonal, business, and political  
6 transactions require trusting that a relationship partner will honor their agreement. Countries with  
7 formal institutions that protect property and contract rights are associated with higher perceptions  
8 of trust and civic cooperation, decreased rates of violent crime in neighborhoods<sup>3</sup>, and increased  
9 economic growth<sup>4</sup>. From an interpersonal perspective, trust can be considered the psychological  
10 state of assuming mutual risk with a relationship partner to attain an interdependent goal in the  
11 face of competing temptations<sup>5,6</sup> which can be assayed using a two-person Investment Game<sup>7,8</sup>.  
12 In this game, a Trustor has the opportunity to invest a portion of a financial endowment to a  
13 Trustee. The investment amount is multiplied by a factor specified by the experimenter (e.g., 3 or  
14 4), and the Trustee ultimately decides how much of the multiplied endowment to return back to  
15 the Trustor to honor or betray their trust. This game has been well studied in behavioral economics  
16<sup>9</sup> and also in the field of decision neuroscience, which has investigated the neurobiological  
17 processes associated with trust<sup>10–18</sup> and its reciprocation<sup>19,20</sup>. This work has found that trust and  
18 reciprocity are associated with neural reward circuitry including the ventral striatum, ventral  
19 tegmental area (VTA), and medial prefrontal cortex. However, it remains unclear precisely how  
20 this neural circuitry produces psychological feelings of trust that drives behavior in interpersonal  
21 interactions. In this paper, we establish a “neurometric” approach to assessing the construct  
22 validity of brain activity patterns predictive of individual decisions to trust in the investment game.

23  
24 Trust is a dynamic state that evolves over the course of a relationship. Early stages of a  
25 relationship are focused on assessing a partner’s trustworthiness level, which can be impacted  
26 by previous interactions<sup>13,14,18,21</sup>, gossip<sup>22–24</sup>, group membership<sup>25</sup>, or judgments based on  
27 appearance<sup>26,27</sup>. Trustors must be willing to endure a risk<sup>28,29</sup>, while Trustees must be willing to  
28 overcome their own self-interest and take an action that fulfills an interdependent goal. As the  
29 relationship progresses, both parties are better able to predict each other’s behavior and develop  
30 a sense of security in the relationship. In this way, trustworthiness reflects a dynamic belief about  
31 the likelihood of a relationship partner reciprocating<sup>14,16,30–32</sup>. These mutually beneficial  
32 collaborations can be rewarding<sup>10,12,33</sup>. However, at some point in the relationship, one person  
33 may end up betraying their partner<sup>34</sup>, which could eventually lead to a dissolution of the  
34 relationship<sup>17</sup>. Thus, the candidate motivations influencing our likelihood to place trust in others  
35 include: (a) beliefs about probability of future reciprocation, (b) anticipated rewards, and (c)  
36 betrayal-aversion.

37  
38 In psychometrics, creating a quantitative measurement of a nebulous and multifaceted concept  
39 such as trust requires establishing construct validity. Constructs provide consensus  
40 understanding of the semantic meaning of an abstract concept based on a nomological network  
41 of associations to other concepts<sup>35</sup>. Validating a construct requires assessing its generalizability  
42 to new populations and contexts and its convergent and discriminant validity to other constructs  
43<sup>36</sup>. Though the principles of psychometrics were originally established for more traditional

## Neurometrics-based construct validity of trust

1 psychological tests and questionnaires, there is growing evidence that patterns of brain activity  
2 can serve as “neurometrics” of constructs<sup>37</sup>. For example, there has been a longstanding interest  
3 in using multivariate decoding methods to determine an individual’s psychological state based on  
4 patterns of brain activity<sup>38–41</sup> with demonstrated success in predicting the intensity of a variety of  
5 affective experiences<sup>42–46</sup>, reconstructing a visual stimulus<sup>47</sup> or uncovering its semantic meaning  
6<sup>48</sup>. Neurometrics has several advantages over psychometrics in that it can utilize a high  
7 dimensional measurement of voxel activity observed during the engagement of a specific  
8 psychological process without requiring retrospective verbal self-report (e.g., questionnaires) or  
9 completing many different behavioral tasks (e.g., intelligence tests). By leveraging quickly  
10 changing scientific norms in open data sharing<sup>49–53</sup>, it is increasingly possible to train a model  
11 predictive of a psychological state using brain activity such as pain<sup>42</sup>, and establish a nomological  
12 network based on the model’s convergent and discriminative validity with other constructs such  
13 as negative emotions<sup>45</sup>, cognitive control<sup>41</sup>, social rejection<sup>54</sup>, and vicariously experienced pain  
14<sup>43</sup>.

15

16 Building on this approach, in this study we use supervised multivariate pattern-based analysis to  
17 predict individual decisions to trust a relationship partner in an interpersonal context using data  
18 from two previously published studies<sup>12,14</sup> (Figure 1A). We then establish the neurometric  
19 properties of this brain model by assessing its generalizability to a slightly different version of the  
20 task collected in a different country<sup>55</sup> (Figure 1B) and its convergent and divergent validity across  
21 11 different tasks probing risk<sup>56,57</sup>, affect<sup>45,58</sup>, rewards<sup>59–61</sup>, cognitive control<sup>62</sup>, and social  
22 cognition<sup>63–66</sup>. This process allows us to characterize the psychological properties of the construct  
23 of trust using neurometric analyses (Figure 1C). Based on the findings outlined above, we  
24 hypothesize that the construct of trust will be positively associated with beliefs of safety, feelings  
25 of anticipated reward, and negatively with feelings of negative affect, but not associated with other  
26 psychological processes (Figure 1D).

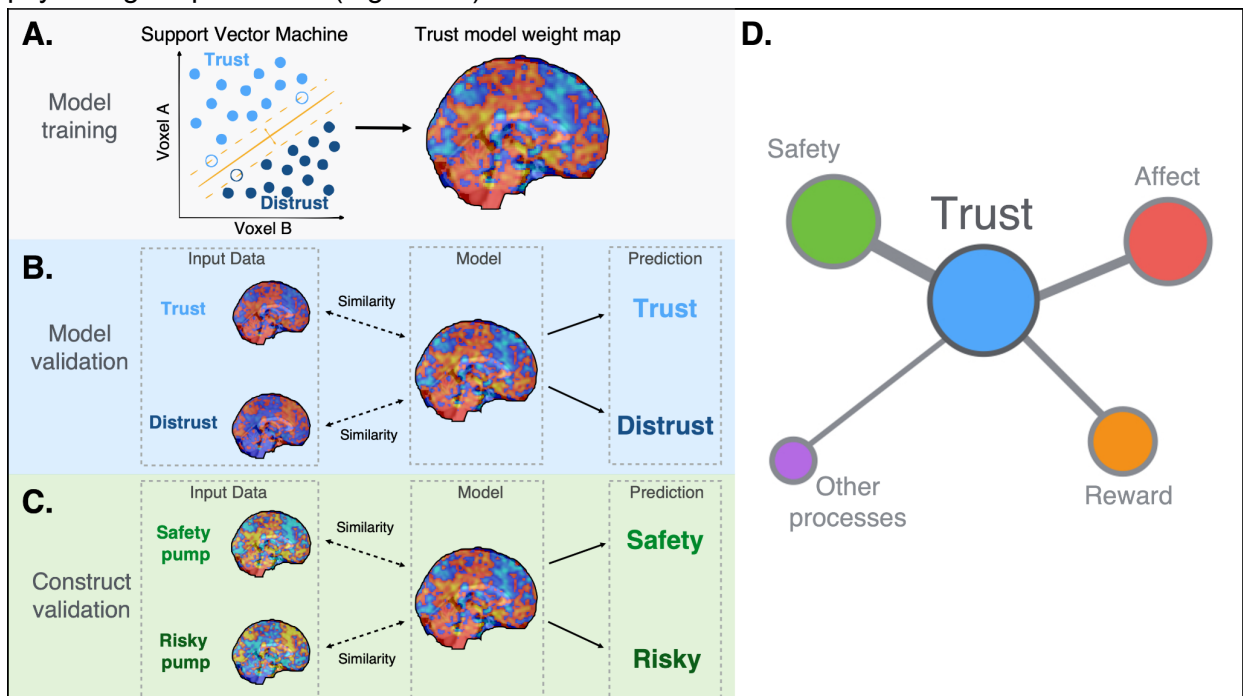

27

## Neurometrics-based construct validity of trust

1 **Figure 1. A demonstration of construct validity based on neurometric information.** (A) A support vector machine  
2 algorithm was used to train the trust model. (B) An independent trust dataset was used to validate the trust model's  
3 generalizability. (C) We tested the model on independent datasets such as the Balloon Analog Risk Task to assess the  
4 convergent and discriminant validity of the trust model. (D) We hypothesized that trust was associated with beliefs of  
5 safety, feelings of anticipated reward, and affect, but not other processes.

## 6 Results

### 7 Training trust brain model

8 Using data from two published studies<sup>12,14</sup>, we trained a linear Support Vector Machine (SVM) to  
9 classify when participants (n=40) decided to trust a relationship partner in the investment game  
10 using whole-brain patterns of brain activity (Figure 1A). We performed an initial temporal data  
11 reduction using univariate general linear models (GLMs) to create an average map of each  
12 participant's brain response when making decisions to trust or not. We then used a leave-one-  
13 subject-out (LOSO) cross-validation procedure to evaluate the performance of our multivariate  
14 SVM model in classifying maps associated with each participant's decisions to prospectively trust  
15 or distrust using data from the rest of the participants. Our trust brain model (Figure 2A) was able  
16 to accurately discriminate between trust and distrust decisions within each participant (forced-  
17 choice accuracy: 90%,  $p < 0.001$ , Figure 2B & 2C, Table S1). Forced choice tests compare the  
18 relative pattern expression of the model between brain maps within the same participant and are  
19 particularly well suited for fMRI because they do not require signals to be on the same scale  
20 across individuals or scanners<sup>42</sup>.

21  
22 To establish the face validity of our model, we used a parametric bootstrap to identify which voxels  
23 most reliably contributed to the classification, which involved retraining the model 5,000 times  
24 after randomly sampling participants with replacement. This procedure is purely for visualization  
25 and not used for spatial feature selection<sup>67</sup>. Consistent with prior work, we observed positive  
26 weights in the ventromedial prefrontal cortex (vmPFC), septal area<sup>12,14,68</sup>, amygdala, and ventral  
27 hippocampus. Negative weights were found in the dorsal anterior cingulate cortex (dACC) and  
28 bilateral insula (Figure 2A). The pattern of weights learned across these bootstrap were highly  
29 reliable. We computed the pairwise spatial similarity of the whole brain pattern estimated across  
30 each bootstrap iteration and observed a high level of spatial consistency,  $r=0.91$ <sup>45</sup>.

31  
32 Next, we trained a general trust model using data from all participants and evaluated its  
33 generalizability on a variant of the trust game in which participants receive feedback about their  
34 partner's decisions regardless if the participant decided to trust or not (Figure 1B). Importantly,  
35 we found that our model was able to accurately discriminate between the trust and distrust  
36 decisions from participants recruited from a different country collected on a different scanner  
37 (forced-choice accuracy: 82%,  $p = 0.006$ , Figure 2B, Table S1). This provides further confirmation  
38 that our model is capturing aspects of the psychological experience of trust that is shared across  
39 participants.

40

## Neurometrics-based construct validity of trust

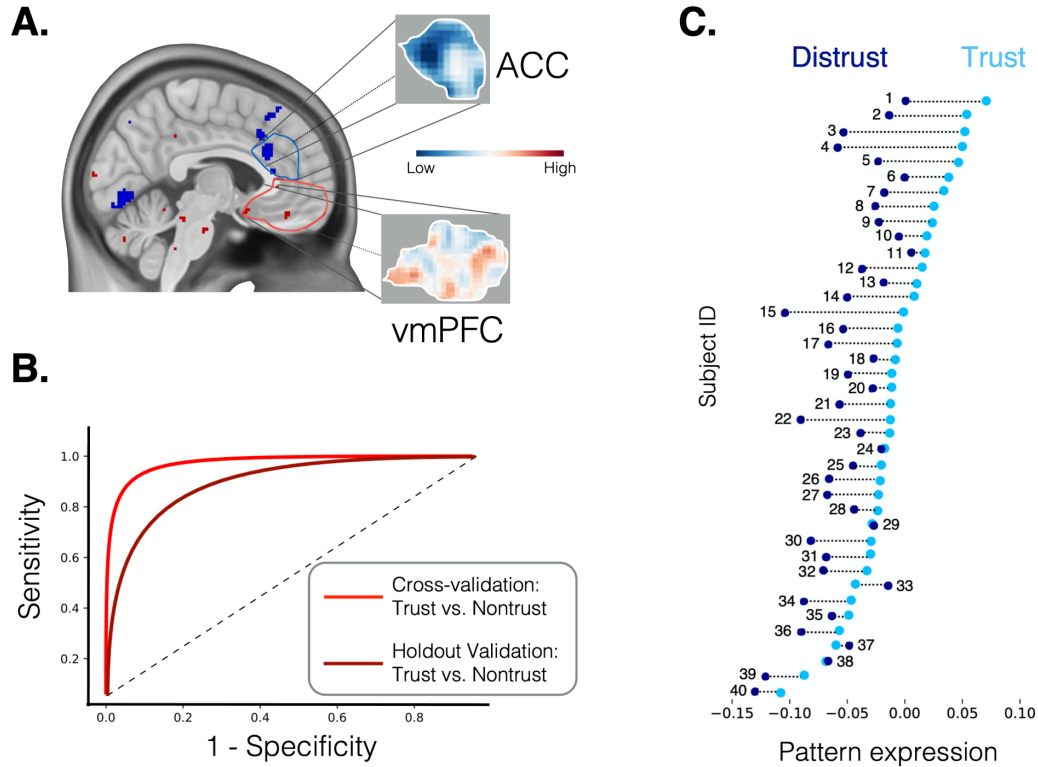

1  
2 **Figure 2. The trust model and its performance in the training and validation dataset.** (A) The trust model is a  
3 whole brain pattern of voxel weights that can be linearly combined with new data to predict psychological levels of trust.  
4 We visualize the voxels that most reliably contribute to the classification using a bootstrap procedure (thresholded  $p <$   
5 0.005 uncorrected for visualization). (B) The receiver-operating-characteristic (ROC) plot highlights the sensitivity and  
6 specificity of the model in cross-validation and in an independent holdout dataset. (C) We plot the pattern expression,  
7 which reflects the spatial correlation between the model and decisions to trust and distrust across each of the 40  
8 participants in the training dataset.  
9

## 10 Construct Validity

11 After establishing the sensitivity of our model to accurately discriminate trust decisions, we next  
12 sought to evaluate the generalizability of the trust model to other psychological constructs using  
13 additional datasets. If the model performs at chance in other contexts, then this establishes the  
14 specificity of the model in capturing trust. However, if the model gets confused in other contexts,  
15 then this may reflect overlap in the psychological experience of trust to other related constructs.

16  
17 Decisions to trust a relationship partner signal that the participant believes the partner is likely to  
18 reciprocate<sup>30</sup>. Trust reflects security in the relationship that the partner will behave as expected  
19 in their mutually interdependent interests. We first examined whether the trust model might be  
20 related to beliefs of safety, which can be measured using risk-taking tasks. The Balloon Analog  
21 Risk task (BART) is among the most widely used behavioral assay of risk-taking behavior<sup>56,57</sup>. In  
22 this task, participants are presented a series of colorful (the risk condition) or achromatic balloons  
23 (the safety or control condition) and are instructed to inflate the balloons. In the risk condition,

## Neurometrics-based construct validity of trust

1 participants can choose to inflate a balloon and only receive a reward if the balloon does not  
2 explode. However, each inflation is associated with an increasing probability of explosion, and  
3 when the balloon explodes, participants do not receive a reward for that round<sup>56,57</sup>. In contrast, in  
4 the safety condition, participants are also instructed to inflate a series of balloons, but there is no  
5 risk of the balloons exploding, nor an opportunity to receive a reward. We calculated the spatial  
6 similarity of our trust model to univariate beta maps from a GLM measuring average brain activity  
7 to the risk or safety conditions from two independent BART datasets (N=15 in dataset 3<sup>56</sup> and N  
8 = 123 in dataset 4<sup>57</sup>; Table S1). In both datasets, we found that the trust model could accurately  
9 discriminate between the safety and risk conditions (accuracy=93%,  $p < 0.001$  in dataset 3;  
10 accuracy=93%,  $p < 0.001$  in dataset 4; Figure 3B-2). These results indicate that the trust model  
11 captures a psychological experience that is shared with beliefs about safety when making risky  
12 choices (Figure 3A-2). When a relationship partner seems untrustworthy and reciprocation seems  
13 risky, participants will choose to keep their money rather than investing it.

14  
15 Next, we explored if the trust model captured aspects of the experience related to negative affect.  
16 One reason why people may choose to distrust and not invest their money in a relationship partner  
17 is because of potential concerns about the partner betraying their trust and keeping all of the  
18 money. This results in negative utility for both losing money, and also being betrayed<sup>34</sup>. To test  
19 this hypothesis, we evaluated if the trust model might be inversely related to feelings of negative  
20 affect elicited by pictures from the international affective picture system (IAPS) from two  
21 independent datasets (Table S1). We found that in dataset 5 (N=93)<sup>45</sup>, the trust model  
22 differentiated between conditions of neutral and negative emotional pictures (accuracy = 72%,  $p$   
23  $< 0.001$ ; Figure 3B-3). A similar finding was also shown in dataset 6 (N=56)<sup>58</sup>, where the trust  
24 model discriminated between the neutral and negative-valence picture conditions (accuracy =  
25 69%,  $p = 0.002$ ; Figure 3B-3) as well as between positive and negative-valence conditions  
26 (accuracy = 73%,  $p < 0.001$ ; Figure 3B-3). These analyses provide evidence of overlap in the  
27 psychological processes associated with trust and negative affect. Specifically, decisions to trust  
28 are associated with less negative affect, consistent with a betrayal-aversion motivation. However,  
29 it is also possible that decisions to trust are associated with positive affect, but dataset 6 rules out  
30 this possibility. In this dataset, we did not observe a significant association with viewing positive  
31 compared to neutral pictures (accuracy = 50%,  $p = 0.551$ ; Table S1), only positive and neutral  
32 compared to viewing negative pictures.

33  
34 Third, we examined whether the trust model can be generalized to feelings of anticipated reward.  
35 We have previously demonstrated that learning that a close friend reciprocated is associated with  
36 a greater rewarding experience compared to when a stranger reciprocates<sup>12</sup>, suggesting that  
37 trust may be associated with the anticipation of a future reward. To test this hypothesis, we  
38 evaluated whether our model was related to reward across three different tasks<sup>59,60,69</sup>. In dataset  
39 7 (N=64; Table S1), participants guessed whether a randomly drawn card would be higher or  
40 lower than a specific number. If they were correct, they would receive a monetary reward, and if  
41 they were incorrect they would lose money<sup>70</sup>. We found that the trust model performed at chance  
42 in differentiating experienced rewards from losses<sup>59</sup> (accuracy = 42%,  $p = 0.921$ ; Figure 3B-4). A  
43 similar result was also found in dataset 8 (N=18; Table S1), in which participants were shown  
44 either a cue indicating maximal gain or loss<sup>60</sup>, and the trust model was unable to discriminate

## Neurometrics-based construct validity of trust

1 between these two conditions (accuracy = 66%,  $p = 0.119$ ; Figure 3B-4). The trust model also  
2 failed to show a generalizability to discriminate anticipated rewards from no-rewards in the  
3 monetary incentive delay task<sup>71</sup> in dataset 9 (N=29; Table S1; accuracy = 38%,  $p = 0.933$ ; Figure  
4 3B-4)<sup>61</sup>. Thus, contrary to our hypotheses, our results revealed that the trust model has no clear  
5 association with feelings of anticipated reward across all three datasets related to anticipated or  
6 experienced rewards (Figure 3A-2).

### 7 Specificity of trust model

8 There are many other potential psychological aspects of the trust experience that can be  
9 evaluated using this neurometric approach. First, it is possible that people may vary in their  
10 preferences for selfishness and cooperation, and choosing to trust may involve overriding selfish  
11 motivations, which would require exhibiting cognitive control<sup>72,73</sup>. We tested this hypothesis by  
12 applying the model to a stop signal task (dataset 10; N=19; Table S1)<sup>62</sup>, in which participants are  
13 instructed to override a prepotent response, and found that the trust model was unable to  
14 discriminate between the successful inhibition and inhibition failure conditions (accuracy = 57%,  
15  $p = 0.326$ ; Figure 3B-5). Decisions to trust may also require social cognition to consider the other  
16 player's mental states such as their beliefs, preferences, and financial outcomes. In order to  
17 demonstrate the specificity of the trust construct, we additionally tested our model on several  
18 datasets probing distinct aspects of social cognition. We found that the trust model did not  
19 generalize to perceptual judgments such as familiarity, in which participants judged whether a  
20 face is familiar or unfamiliar to the participants (dataset 11; N=16; accuracy = 63%,  $p = 0.217$ ;  
21 Figure 3B-5; Table S1)<sup>63</sup>. We also found that the trust model did not generalize to the  
22 classification between viewing social and non-social scenes in dataset 12 (N=36; accuracy = 47%,  
23  $p = 0.686$ ; Figure 3B-5; Table S1)<sup>64</sup>. Lastly, we tested if the trust model was similar to self-  
24 referential cognition in a task in which participants made self-referential judgments or perceptual  
25 judgments (e.g., type of font) to a variety of trait adjectives (dataset 13; N=27; accuracy = 40%,  $p$   
26 = 0.876; Figure (B-5); Table S1)<sup>65,66</sup>. Together, these findings indicate that the trust model was  
27 not associated with cognitive control, social perception, or self-referential processing (Figure 3A-  
28 2).  
29



## Neurometrics-based construct validity of trust

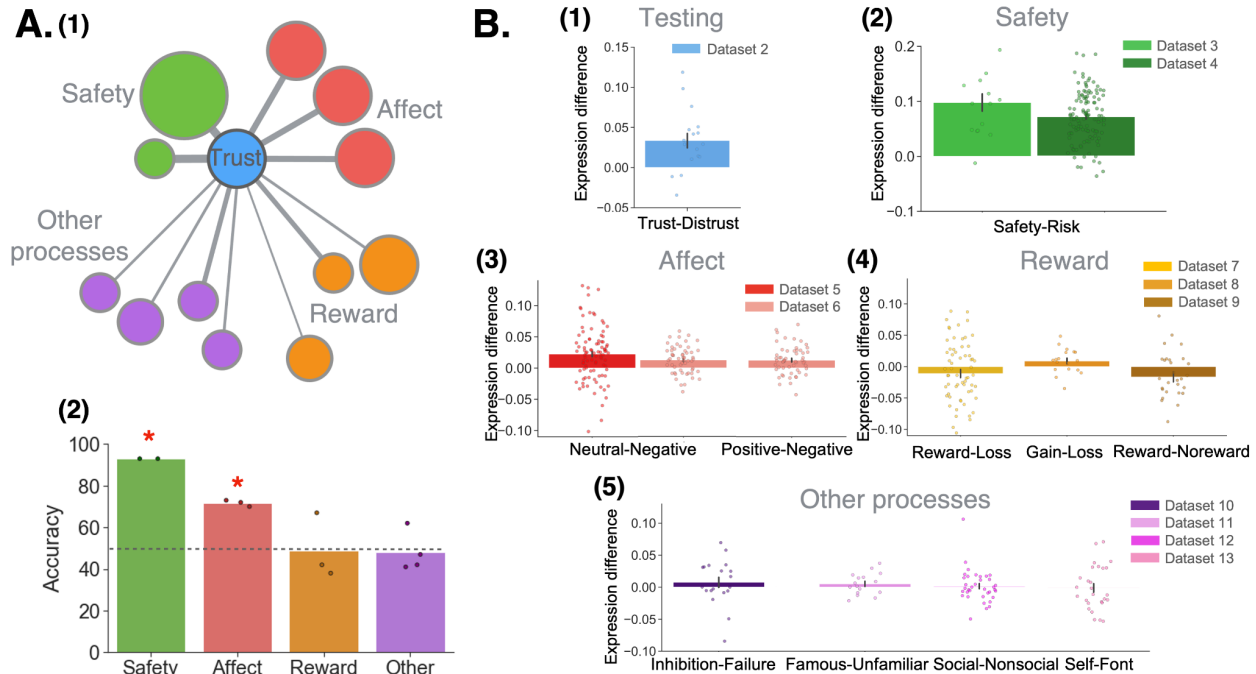

1  
2 **Figure 3. Construct validity of the trust model and model generalizability.** (A) (1) Network plot illustrates that the  
3 trust model significantly generalizes to safety and affect datasets, but not to reward and other processing datasets. The  
4 distances and thickness of edges are weighted based on every 10% decrease in classification accuracy, and the size  
5 of nodes represents sample size of each dataset. (2) The forced-choice classification accuracy for each dataset within  
6 the four domains was shown in the bar plot. Only the safety and affect domains demonstrated above chance accuracy  
7 across datasets. (B) Trust model pattern expression differences between the two conditions in the: (1) trust testing  
8 datasets, (2) two safety datasets, (3) two affect datasets, (4) three reward datasets, as well as (5) four datasets involving  
9 cognitive control and social cognition.

10

## 11 Trust Nomological Network

12 Finally, we constructed a nomological network of psychological states by computing the spatial  
13 similarity of patterns of brain activity elicited by different experimental tasks. To do so, we first  
14 used Uniform Manifold Approximation and Projection (UMAP)<sup>74</sup>, a nonlinear dimensionality  
15 reduction technique to visualize similarities of whole brain spatial patterns across all participants  
16 (N=553) from all thirteen datasets. We found that whole-brain multivariate patterns of trust were  
17 closer to those of beliefs of safety, feelings of anticipated no-reward or loss, and feelings of neutral  
18 or positive affect (Figure 4A). By contrast, whole-brain multivariate patterns of distrust were closer  
19 to those of beliefs of risk, feelings of anticipated reward, and feelings of negative affect (Figure  
20 4A). Similar findings were also revealed in several brain regions, such as vmPFC, dmPFC and  
21 dACC (Figure S1).

22

Neurometrics-based construct validity of trust

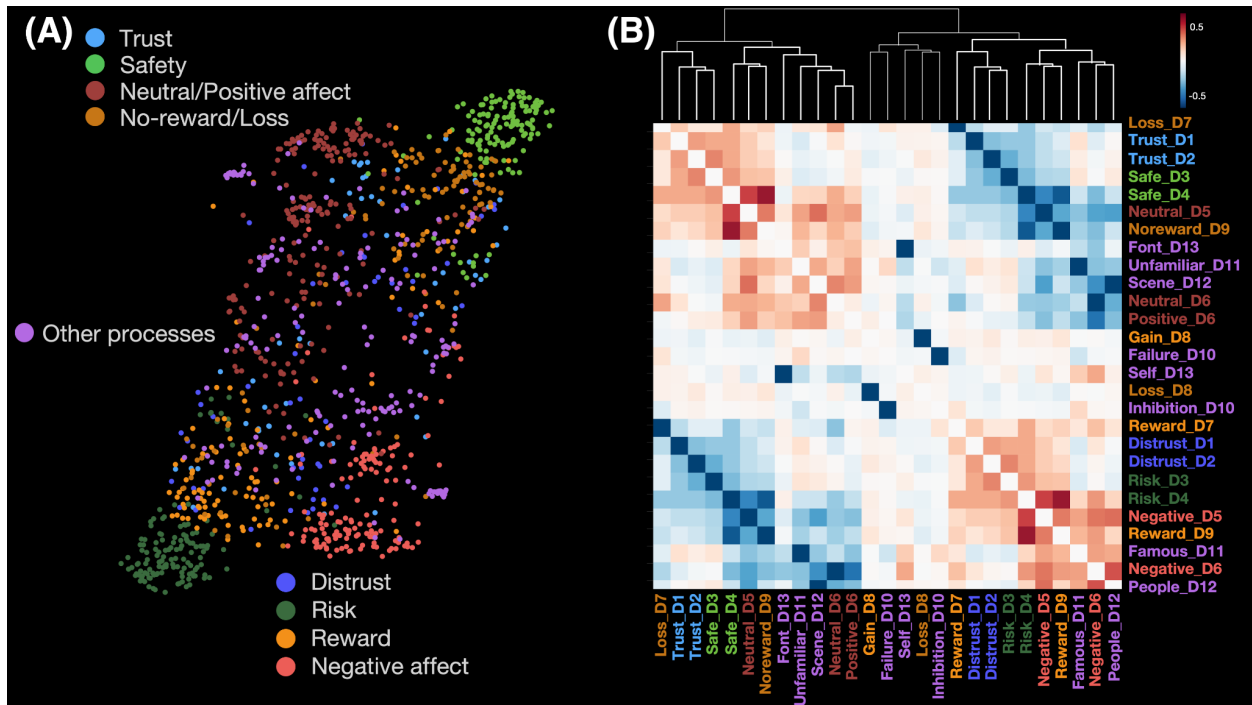

1  
2 **Figure 4. Spatial pattern similarity across all brain data from thirteen datasets.** (A) Based on whole-brain spatial  
3 patterns, trust was more similar to safety, no-reward, neutral and positive affect; whereas distrust was more similar to  
4 risk, reward, and negative affect. (Each dot represents a beta map from each participant) (B) Hierarchical clustered  
5 heatmap of correlation across the mean spatial pattern from each condition (26 conditions from 13 datasets) also  
6 revealed similar findings as above.  
7  
8

9 We quantitatively verified the results from the UMAP visualization by computing the average brain  
10 response across participants for each condition of each task and then evaluating the pairwise  
11 spatial similarity of these maps (Figure 4B). We found that the spatial patterns between two trust  
12 conditions were highly similar to each other ( $r = 0.33$ ), the training trust condition in dataset 1 was  
13 similar to the two safety conditions ( $r = 0.31$  for dataset 3 and  $r = 0.30$  for dataset 4, respectively),  
14 and the validation trust condition in dataset 2 was also similar to the two safety conditions ( $r =$   
15  $0.39$  for dataset 3 and  $r = 0.30$  for dataset 4, respectively). In contrast, the spatial patterns between  
16 the two distrust conditions were highly similar to each other ( $r = 0.32$ ), the training distrust  
17 condition in dataset 1 was similar to the two risk conditions ( $r = 0.31$  for dataset 3 and  $r = 0.30$  for  
18 dataset 4, respectively), and the validation distrust condition in dataset 2 was also similar to the  
19 two risk conditions ( $r = 0.39$  for dataset 3 and  $r = 0.30$  for dataset 4, respectively). In addition, the  
20 safety condition in dataset 4 revealed similar patterns to neutral/positive emotion conditions ( $r =$   
21  $0.30$  for neutral emotion and  $r = 0.19$  for positive emotion in dataset 6), and the risk condition in  
22 dataset 4 was similar to negative emotion conditions ( $r = 0.52$  for dataset 5 and  $r = 0.34$  for dataset  
23 6, respectively; Figure 4B). This means that, based on brain spatial patterns, the construct of trust  
24 is more closely related to beliefs of safety, anticipated no-reward, and non-negative affect, but not  
25 to beliefs of risk, anticipated reward, or negative affect.

## 1 Discussion

2 In this study, we sought to create a model of trust based on patterns of brain activity elicited during  
3 an interpersonal investment task. We employed a neurometric approach <sup>37,40,42,43,45</sup> to characterize  
4 this model by assessing its reliability and validity using multiple previously published open  
5 datasets. This model leverages reliable patterns of brain activity and is sensitive to detecting  
6 psychological states of trust that generalizes to new subjects, scanners, and variants of the  
7 investment game task. In addition, we also assessed the validity of our model <sup>36</sup>. Prior work has  
8 primarily relied on establishing face validity by demonstrating that regions associated with a  
9 construct have a reliable independent contribution to the prediction <sup>42,43,45</sup>. However, directly  
10 interpreting the weights of linear models can potentially be misleading <sup>75</sup>. An alternative approach  
11 based on the principles of construct validity attempts to triangulate a construct by establishing  
12 convergent and discriminant validity with respect to related and distinct constructs probed using  
13 multiple methods <sup>36,41</sup>. This has also been described as establishing a “nomological network” <sup>35</sup>  
14 and identifying the “receptive field” of a model <sup>37</sup>. We assessed the ability of our trust model to  
15 discriminate task conditions across a variety of potentially related psychological constructs elicited  
16 using many different types of tasks across 11 previously published datasets.

17  
18 Overall, we found that our brain model of trust was associated with a distinct signature of related  
19 psychological processes. First, previous work has established that trust reflects dynamic beliefs  
20 about the likelihood of a relationship partner overcoming self-interest and reciprocating <sup>13,30</sup>. We  
21 find strong evidence supporting this interpretation. Across two separate experiments exploring  
22 risky decision-making, our trust model is reliably associated with safety compared to risk, or in  
23 other words, a high degree of certainty in avoiding a negative outcome compared to more  
24 uncertainty in the risky condition. In addition, our pattern similarity analyses indicate that decisions  
25 to not trust are associated with the risky conditions, while the trust conditions are associated with  
26 the safety conditions. Second, we find support for the hypothesis that trust requires overcoming  
27 concerns of potential betrayal <sup>17,34</sup>. We find that our trust model is reliably negatively associated  
28 with the psychological experience elicited from viewing negative arousing images relative to  
29 viewing neutral or positive images. We did not observe a significant relationship with differences  
30 between positive vs neutral indicating that it is neither positive nor neutral images driving this  
31 effect. Moreover, pattern similarity analyses revealed that viewing negative images correlated  
32 with the risky decision condition, while the neutral images correlated with the safety decisions.  
33 These findings are consistent with a betrayal-aversion account. It has been hypothesized that  
34 people may choose to keep their money and avoid investing in a relationship partner not just  
35 because they don’t want to lose their money, but also because they want to avoid feeling betrayed  
36 by another person <sup>34</sup>. Of course, viewing negative arousing images is hardly the same thing as  
37 being betrayed and we believe this finding should be further substantiated in future work. Third,  
38 contrary to our predictions, we found no evidence that trust is associated with experiencing or  
39 anticipating a future reward. We tested our trust model on 3 distinct tasks probing the anticipation  
40 and experience of reward and found no indication that trust was related to reward or its  
41 anticipation. We think this is particularly important as it has been often assumed that the main  
42 motivation for trusting a relationship partner in the trust game is because the expected value is  
43 higher <sup>9,12,30</sup>. Our findings suggest that it is not the reward, but rather the probability calculus that

## Neurometrics-based construct validity of trust

1 may be driving decisions to trust. Finally, we also find that trust does not appear to be related to  
2 overcoming a prepotent tendency to be selfish, which would recruit cognitive control. Nor does it  
3 appear to be involved in social perceptual judgments such as whether an image is a person or an  
4 object, or if a person has been seen before or is new. We also find no evidence suggesting that  
5 trust involves self-referential processing such as considering self-other relative payoffs <sup>76</sup>.

6  
7 There are several important considerations when interpreting our results. First, we made no  
8 assumptions about potential brain regions that may be involved in the psychological experience  
9 of trust and chose to utilize a whole-brain approach when training our model <sup>67</sup>. This demonstrates  
10 which regions independently and additively contribute to the prediction. However, it is highly likely  
11 that brain activity may be highly collinear, which may lead to instability of the model weights <sup>75,77</sup>.  
12 We used a bootstrap approach to iteratively retrain the model using different subsets of the data  
13 and found that the regions with the largest weights were highly consistent ( $r=0.91$ ). Future work  
14 may consider additionally exploring different types of spatial feature selection <sup>78</sup>. Second, our  
15 model is currently ignoring interactions between brain regions, which may be an important  
16 signature of the trust construct. This might be explored in the future by training new models using  
17 functional connectivity or interactions between brain regions. Third, our model is also agnostic to  
18 individual differences. We have established that the model generalizes to new participants, but it  
19 is not currently able to assess variations in potential motivations (e.g., risk-aversion vs betrayal-  
20 aversion). Future work might use multivariate methods for probing individual differences such as  
21 intersubject representational similarity analysis <sup>20,79,80</sup>. Finally, our construct validity analyses are  
22 completely dependent on the reliability and validity of the additional tasks, which has never really  
23 been fully established. In addition, we have only tested our model on a subset of the possible  
24 related constructs. We see this as an iterative process that cannot be fully addressed by a single  
25 paper, but instead will require continued refinement as more datasets become available in the  
26 future <sup>37</sup>.

27  
28 In summary, using 14 datasets, we establish a neurometric-based construct validity of trust. This  
29 model is stored as a three-dimensional brain image that contains a recipe for how to linearly  
30 combine information from each voxel in the brain <sup>81</sup>. Importantly, this model generalizes beyond  
31 the specific subjects, scanner, or experimental paradigm and can easily be shared with other  
32 researchers <sup>37</sup>. In addition, we move beyond a reverse inference approach <sup>82</sup> in interpreting the  
33 psychological processes associated with trust based on which regions contribute to the prediction  
34 <sup>40,45</sup>, to a more quantitative construct validity approach. These analyses support several previous  
35 accounts of trust, but importantly rule out a reward-based motivation. This provides a proof of  
36 concept that brain activity can be used to make inferences about a psychological process beyond  
37 self-report or behavioral observations. We believe this general approach could be applied to any  
38 other psychological constructs that can be measured using patterns of brain activity.

39

## 1 Methods

### 2 fMRI Dataset

3 **Trust model training datasets.** The training datasets (dataset 1-1 and 1-2) for the trust model  
4 contained data from two published studies<sup>12,14</sup>. In dataset 1-1, 17 participants played an iterated  
5 trust game with three different trustees while undergoing fMRI in a 3T Siemens Allegra scanner  
6 (TR=2000ms; TE=25ms)<sup>14</sup>. Participants were endowed with one dollar and on each trial decided  
7 whether to invest this money in the other trustee (i.e., trust) or keep it (i.e., distrust). Decisions to  
8 trust resulted in the one dollar investment being multiplied by a factor of three. The trustee then  
9 decided whether to keep all three dollars, or share half of the return on the investment back to the  
10 participant (i.e., \$1.50). In dataset 1-2, 23 participants also played a similar iterated trust game  
11 with two different trustees while undergoing fMRI in a 3T Siemens Magnetom Trio scanner  
12 (TR=2000ms; TE=30ms)<sup>12</sup>.

13  
14 In total, there were 40 participants from dataset 1-1 and 1-2 in the current study. We focused our  
15 analysis only on the decision epoch when participants made decisions to either trust or distrust.  
16 fMRI data were analyzed using a combination of custom scripts  
17 (<https://github.com/rordenlab/spmScripts>) for SPM12 and FSL (v5.09; FMRIB). We performed  
18 standard preprocessing in SPM (motion correction, brain extraction and coregistration, slice time  
19 correction). Motion artifact was removed using ICA-AROMA in FSL (Pruim et al., 2015).  
20 Functional data were smoothed using a 5mm kernel in FSL. Each condition was modeled as a  
21 separate regressor in a general linear model (GLM). This included a regressor modeling each of  
22 the decision types (trust or distrust) and the different possible decision outcomes (though these  
23 data were not the focus of the present manuscript). The GLM resulted in a trust whole-brain beta  
24 map and a distrust whole-brain beta map for each trustee (detailed preprocessing and GLM steps  
25 see<sup>12,14</sup>). We then averaged the beta maps across partner types within each participant. These  
26 maps were mean-centered values across all voxels within each beta map<sup>83</sup> and used to train the  
27 trust model.

28  
29 **Trust model validation dataset.** The validation dataset (dataset 2) contained data from 17  
30 participants (mean age = 20.6 years, SD=1.49; 24% female) who participated in a repeated trust  
31 game while undergoing fMRI in a 3T Philips Achieva scanner (TR = 2200 ms, TE = 30 ms, FOV  
32 = 220 × 220 × 114.7 mm; see<sup>55</sup> for more details about the sample and scanning parameters). All  
33 participants provided informed consent and the study was approved by the institutional review  
34 board at Leiden University Medical Center. Participants were instructed to play a trust game with  
35 three different targets, including a friend, an antagonist, and an anonymous peer. The game was  
36 designed to be slightly more similar to a prisoner's dilemma in that both players made their  
37 decisions simultaneously. Unlike a traditional trust game, participants received information about  
38 their partner's decisions regardless if they chose to share or keep. However, the responses from  
39 these targets were pre-determined by the computer and not the actual partner. Similar to dataset  
40 1, we also focused our analysis on the decision epoch when participants made either a trust or  
41 distrust decision. Image pre-processing and analysis was conducted using SPM8 software  
42 ([www.fil.ion.ucl.ac.uk/spm](http://www.fil.ion.ucl.ac.uk/spm)) implemented in MATLAB R2010 (MathWorks). Pre-processing included

## Neurometrics-based construct validity of trust

1 slice-time correction, realignment, spatial normalization to EPI templates, and smoothing with a  
2 Gaussian filter of 8 mm full-width at half maximum (FWHM). The fMRI time series were modeled by a  
3 series of events convolved with a canonical hemodynamic response function (HRF). The data was  
4 modeled at choice and feedback onset as null duration events. During decision-making the choice  
5 events (i.e., trust and keep decisions) were modeled for each of the three partner types. These  
6 modeled events were used as regressors in a general linear model (GLM) with a high pass filter using  
7 a discrete cosine basis set with a cutoff of 120 seconds. The GLM resulted in a trust whole-brain  
8 beta map and a distrust whole-brain beta map for each target. We then computed the mean trust  
9 whole-brain beta map across all three targets and repeated the same procedure for computing  
10 the mean distrust whole-brain beta map within each participant. We then mean-centered values  
11 across all voxels within each of the beta maps for all participants, and the mean-centered beta  
12 maps were used as a novel trust dataset for brain model validation.

13

14 **Safety datasets.** In order to test whether trust is associated with beliefs of safety, we had two  
15 open fMRI datasets using the Balloon Analog Risk Task (BART), in which one condition probes  
16 beliefs of risk and another probes beliefs of safety in this study. The BART aims to elicit naturalistic  
17 risk-taking behaviors, and each participant received two conditions in the fMRI scanner. In the  
18 risk condition, each inflation of balloons is a risky choice (pump), whereas inflating balloons in the  
19 safe condition is not a risky choice (control pump). In dataset 3 (OpenfMRI ds000001)<sup>56</sup>, there  
20 are 15 healthy participants who underwent the two conditions in a 3T Siemens Allegra MRI  
21 scanner. The data were preprocessed by FSL ([www.fmrib.ox.ac.uk/fsl](http://www.fmrib.ox.ac.uk/fsl)), including realignment,  
22 highpass-filtering, brain extraction with BET, motion correction, spatial normalization, and  
23 smoothing with a 5 mm FWHM Gaussian kernel. For trials in the risky condition, the risky inflation  
24 and the other two task-related regressors were modeled separately in the GLM. For trials in the  
25 safe condition, the safe inflation and the other two task-related regressors were also modeled  
26 separately in the GLM. For each participant, the GLMs resulted in a risk inflation whole-brain beta  
27 map and a safe inflation whole-brain beta map. We then mean-centered values across all voxels  
28 within each beta map for all participants, and these mean-centered beta maps were used as data  
29 representing the risk condition and safety condition in the generalization testing.

30

31 In dataset 4 (OpenfMRI ds000030)<sup>57</sup>, there are 123 healthy participants who also underwent the  
32 two conditions in a 3T Siemens Allegra MRI scanner. The data were preprocessed by FMRIPREP  
33 version 0.4.4, including motion correction, skullstripping and coregistration to T1 weighted  
34 volume, applying brain masks, realignment, normalization, and spatial smoothing with a 5 mm  
35 FWHM Gaussian kernel<sup>84</sup>. A risk inflation (accept pump) and a safe inflation (control pump), along  
36 with the other seven regressors were modeled in the GLM. For each participant, the GLM resulted  
37 in a risk inflation whole-brain beta map and a safe inflation whole-brain beta map, and we then  
38 mean-centered values across all voxels within each beta map for all participants. These mean-  
39 centered risk inflation beta maps and safe inflation beta maps were then used as data  
40 representing the risk condition and safety condition in the generalization testing.

41

42 **Affect datasets.** Two affect datasets were included in the current study. Dataset 5 came from  
43 the PINES dataset<sup>45</sup>, which was an open dataset on Neurovault  
44 (<https://identifiers.org/neurovault.collection:503>). In this dataset, participants were asked to view

## Neurometrics-based construct validity of trust

1 numerous negative and neutral-valenced pictures from the international affective picture system  
2 (IAPS), and then rated how negative they felt from 1 (neutral) to 5 (most negative). Details of the  
3 experimental design were described in previous studies<sup>45,85</sup>. Among these participants, this  
4 current study only used data from those (N = 93) whose ratings had 1 (neutral) and 5 (most  
5 negative). The fMRI data was collected in a Siemens Trio 3T scanner (TR= 2000 ms, TE=29ms),  
6 and then preprocessed by SPM8, including unwarping, realignment, coregistration, normalization,  
7 spatial smoothing with a 6 mm FWHM Gaussian kernel and high pass filtering (180 sec cutoff).  
8 Then five separate regressors indicating different rating levels (1 to 5) were modeled in the GLM  
9 for each participant as well as 24 covariate regressors modeled movement effects (6 realignment  
10 parameters demeaned, their 1st derivatives, and the squares of these 12 regressors). Since our  
11 goal was to compare the neutral and negative condition, only the neutral (rating = 1) beta map  
12 and the negative (rating = 5) beta map were included in the current study. We then mean-centered  
13 values across all voxels within each of the above two kinds of beta maps for all participants. These  
14 mean-centered neutral and negative beta maps were taken as data in the generalization testing.

15  
16 In Dataset 6, fifty-six participants were recruited to complete an emotional scene task<sup>58</sup>. In this  
17 task, participants were asked to make indoor/outdoor categorization judgments on scenes in a  
18 block design. Each block lasted 15 seconds and consisted of six emotional scenes with the same  
19 emotional valence. Each emotional-scene block alternated with a 15-sec fixation block, and each  
20 participant went through five blocks for each of three different valences, including positive, neutral,  
21 and negative valence. The emotional valence of the scenes used in each condition were selected  
22 from the IAPS and have been validated in a previous fMRI study<sup>86</sup>. The fMRI data was collected  
23 in a Philips Intera Achieva 3T scanner (TR = 2500 ms, TE = 35 ms), and then preprocessed by  
24 SPM8, including slice timing correction, unwarping, realignment, coregistration, normalization,  
25 and spatial smoothing with a 6 mm FWHM Gaussian kernel. The positive, neutral, and negative  
26 valence conditions were then modeled separately in the GLM for each participant. The GLM  
27 resulted in a positive, neutral, and negative emotion beta map from each participant, and we then  
28 mean-centered values across all voxels within each beta map for all participants. These mean-  
29 centered beta maps were used in the current study, representing three different emotional-  
30 valence conditions in the generalization testing.

31  
32 **Reward datasets.** Three reward anticipation fMRI datasets were used in the current study.  
33 Dataset 7 comes from the Human Connectome Project<sup>59</sup>, and the reward anticipation task used  
34 in this dataset is the Card Gambling task<sup>70</sup>. In this task, participants were asked to guess whether  
35 the number on a mystery card is greater or smaller than five. Participants would receive a reward  
36 of one dollar if the number is greater than five; by contrast, they would lose fifty cents if the number  
37 is smaller than five. In total, fMRI data from 64 participants were collected and preprocessed with  
38 the HCP fMRIVolume pipeline<sup>87</sup>. The preprocessing steps included gradient unwarping, motion  
39 correction, fieldmap-based EPI distortion correction, coregistration, normalization, and spatial  
40 smoothing with a 4 mm FWHM Gaussian kernel. The reward and loss conditions were then  
41 modeled in the GLM. The GLM resulted in a reward beta map and a loss beta map within each  
42 participant, and we then mean-centered values across all voxels within each beta map for all  
43 participants. These mean-centered reward and loss beta maps were then used as data  
44 representing the reward condition and non-reward/loss condition in the generalization testing.

## Neurometrics-based construct validity of trust

1  
2 In dataset 8, eighteen participants completed a reward/loss anticipation task while undergoing  
3 scanning in a 3T Siemens Trio scanner<sup>60</sup>. In this task, different cues were shown on the screen  
4 indicating different amounts of monetary reward or loss. After the cue phase, an outcome phase  
5 occurred, indicating the actual amount of reward and loss. The monetary reward or loss amounts  
6 were equally sampled from [1, 5, 20, 100]. The data were preprocessed using BrainVoyager QX  
7 2.8 and NeuroElf V1.1, including: motion correction, slice timing correction, high-pass filtering,  
8 normalization, and spatial smoothing with a 6 mm FWHM Gaussian kernel. The cue and outcome  
9 phases with different levels were modeled separately in the GLM for each participant. Only the  
10 maximal-reward (i.e., a gain of \$100) and maximal-loss (i.e., a loss of \$100) beta maps from each  
11 participant were used in the current study, and we then mean-centered values across all voxels  
12 within each beta map for all participants. These mean-centered beta maps would represent the  
13 reward condition and non-reward/loss condition in the generalization testing.

14  
15 In dataset 9 (OpenNeuro ds003242)<sup>61</sup>, twenty-nine participants underwent a monetary incentive  
16 delay task<sup>71,88</sup> in an fMRI scanner. Before the task, participants were asked to memorize five  
17 abstract art images, and these familiar images were then taken as cues in the reward condition.  
18 In the reward condition, after a familiar image was shown on the screen as a reward cue, a number  
19 ranging from 1 to 9 was shown and participants had to respond whether the number was larger  
20 or smaller than 5. If participants responded fast enough (< 500 ms), they would receive a reward  
21 of one dollar. In the other condition, the non-reward condition, after a new abstract art image was  
22 shown as a non-reward cue, a number was also shown on the screen and participants were also  
23 asked to respond whether the number is greater or smaller than 5. However, the responding  
24 performance in the non-reward condition was not associated with any reward. FMRIPREP<sup>89</sup> was  
25 used for brain data preprocessing, and the steps included motion correction, skullstipping and  
26 coregistration to T1 weighted volume, applying brain masks, realignment, normalization, and  
27 spatial smoothing with a 6 mm FWHM Gaussian kernel. We modeled the reward condition and  
28 non-reward conditions as separate regressors in a univariate GLM, along with 24 covariate  
29 regressors modeling movement effects (6 realignment parameters demeaned, their 1st  
30 derivatives, and the squares of these 12 regressors), a 128 sec high pass filter using a discrete  
31 cosine transform, and separate scanner spikes based on frame differences that exceeded 3  
32 standard deviations. For each participant, the GLM resulted in a reward beta map and a non-  
33 reward beta map, which were then mean-centered across all voxels within each beta map for all  
34 participants. These mean-centered reward and non-reward beta maps were then used as data  
35 representing the reward condition and non-reward/loss condition in the generalization testing.

36  
37 **Other processing datasets.** In order to demonstrate the specificity of our trust model, we  
38 validated our model on four additional datasets, including cognitive control, familiarity, social  
39 cognition and self-referential cognition. To test the domain of cognitive control, in Dataset 10,  
40 nineteen participants performed a stop-signal task (SST) in a 3T Siemens Allegra MRI scanner  
41 (TR=2000ms, TE=30ms)<sup>62</sup>. This open dataset is available on both OpenNeuro (ds000007) and  
42 Neurovault (<https://neurovault.org/collections/1807/>). We used data from Neurovault task001,  
43 which was a manual SST. For the go trials in this task, participants were asked to press on the  
44 right or left button according to whether the letter “T” or “D” was shown on the screen. For stop



## Neurometrics-based construct validity of trust

1 trials, an auditory tone cue signaling stop was played after the letter being shown with some delay  
2 (stop-signal delay; SSD), and participants were asked to inhibit their approaching responses  
3 toward the button. Throughout the task, the length of SSD changed according to whether  
4 participants succeeded or failed to inhibit their responses in order to maintain the accuracy rate  
5 at 50%. Thus, the number of inhibition-success and inhibition-failure trials would be the same,  
6 and we would use data from both of these two conditions for further analysis. The data was  
7 preprocessed by FSL version 3.3, and the preprocessing steps included coregistration,  
8 realignment, motion correction, denoising using MELODIC, normalization, spatial smoothing with  
9 a 5 mm FWHM Gaussian kernel, and high-pass filtering. Details about the preprocessing steps  
10 were described in the original study<sup>62</sup>. Four conditions, including go, inhibition-success, inhibition-  
11 failure, and nuisance events, were modeled separately in the GLM for each participant. The GLM  
12 resulted in a go, inhibition-success, inhibition-failure, and nuisance event beta map, and we then  
13 mean-centered values across all voxels within each beta map for all participants. Only the mean-  
14 centered inhibition-success and inhibition-failure beta maps were used in the generalization  
15 testing.

16  
17 For the domain of familiarity, in Dataset 11, sixteen participants completed a face-viewing task in  
18 a Siemens 3T TRIO scanner (TR=2000ms, TE=30ms)<sup>63</sup>. This open dataset is available on both  
19 OpenNeuro (ds000117) and Neurovault (<https://neurovault.org/collections/1811/>), and we used  
20 data downloaded from Neurovault. In this face-viewing task, participants were asked to view three  
21 different types of faces, including famous, unfamiliar, and scrambled faces. Each trial began with  
22 a fixation cross on the screen, and then one of the three types of faces were shown on the screen.  
23 Participants were asked to pay attention to all trials throughout the whole experiment. The fMRI  
24 data was preprocessed by SPM8, which included slice timing correction, realignment,  
25 coregistration, normalization, and spatial smoothing with a 8 mm FWHM Gaussian kernel. Three  
26 conditions, including famous, non-familiar, and scrambled faces were modeled separately in the  
27 GLM for each participant. The GLM resulted in a famous, non-familiar, and scrambled beta map,  
28 and we then mean-centered values across all voxels within each beta map for all participants.  
29 Only the mean-centered famous and non-familiar beta maps were used in the current study for  
30 the generalization testing.

31  
32 For the domain of social cognition, in Dataset 12, thirty-six participants completed a scene  
33 judgment task in a Philips Intera Achieva 3T scanner (TR = 2500 ms, TE = 35 ms)<sup>64</sup>. In this task,  
34 each participant was asked to make indoor/outdoor categorization judgements on 270 different  
35 scenes, including 90 social scenes, 90 non-social scenes, and another 90 food scenes. These  
36 pictures have been used in several studies<sup>90-92</sup>, and compared to non-social scenes, social  
37 scenes have been found to reliably activate brain regions, such as the dmPFC, PCC, and vmPFC  
38<sup>90</sup>. In each trial, a scene image was shown on the screen for 2000 ms, followed by a 500 ms  
39 fixation, and a jitter (range: 0-5000 ms) was followed between each trial. The fMRI data were  
40 preprocessed by SPM8, which included slice timing correction, unwarping, realignment, motion  
41 correction, normalization, spatial smoothing with a 6 mm FWHM Gaussian kernel. The social,  
42 non-social, and food conditions were then modeled separately in the GLM for each participant.  
43 The GLM resulted in a social, non-social, and food beta map, and we then mean-centered values  
44 across all voxels within each beta map for all participants. Only the mean-centered social and

## Neurometrics-based construct validity of trust

1 non-social beta maps from each participant were then used in the current study, representing the  
2 social and non-social condition for the generalization testing.

3  
4 For the domain of self-referential cognition, in Dataset 13, twenty-seven participants completed a  
5 trait-judgment task in a Philips Intera Achieva 3T scanner (TR = 2500 ms, TE = 35 ms)<sup>65,66</sup>. In  
6 this trait-judgment task, participants were asked to make three different targets of judgments,  
7 including self-judgment (i.e. does this adjective describe you?), mother-judgment (i.e. does this  
8 adjective describe your mother?) and font-judgment (i.e. is this adjective printed in bold-faced  
9 letters?) in two different languages. For each trial, a trait adjective word (e.g. smart) was paired  
10 with a target word (i.e. SELF, MOTHER, or FONT) and were shown on the screen for 2500ms.  
11 Although each trait word was presented once in Mandarin and once in English, the current study  
12 only used the three conditions in Mandarin. The fMRI data was preprocessed by SPM8, which  
13 included slice timing correction, unwarping, realignment, motion correction, normalization, spatial  
14 smoothing with a 6 mm FWHM Gaussian kernel. The self-judgment, mother-judgment, and font-  
15 judgment conditions were then modeled separately in the GLM for each participant. The GLM  
16 resulted in a self-judgment, mother-judgment, and font-judgment beta map, and lastly we mean-  
17 centered values across all voxels within each beta map for all participants. Only the mean-  
18 centered self-judgment and font-judgment beta maps from each participant were then used for the  
19 generalization testing in the current study.

20

## 21 Training and validating a trust model

22 ***Training model and cross-validation within the training dataset.*** We used a three stage  
23 approach to train our whole-brain multivariate classification model using a linear Support Vector  
24 Machine (SVM). First, we were interested in evaluating how well the model might generalize to  
25 new data using a leave-one-subject-out (LOSO) cross-validation procedure, ensuring that every  
26 subject served as both training and testing data<sup>45</sup>. This allowed us to evaluate how a model  
27 trained on 39 participants could classify trust or distrust decisions from the left-out participant and  
28 provided an estimate of the expected generalizability of the model to similar datasets. Second,  
29 we were interested in assessing which voxels most reliably contributed to the trust classification.  
30 We used a parametric bootstrap procedure, which involved retraining the model 5,000 times after  
31 randomly sampling participants with replacement. The resulting distribution was then converted  
32 into a z-value at each voxel, which allowed the map to be thresholded based on a corresponding  
33 p-value. We used  $p < 0.005$  as the threshold to visualize the most reliable weights, which allowed  
34 us to assess the face validity of the model (Figure 2A). It is important to note that we did use this  
35 thresholded map to perform any inferences. We further computed the spatial intersubject  
36 correlation across the models trained on each bootstrapped sample to estimate the approximate  
37 reliability of the spatial pattern of weights. This metric can be interpreted similarly to a reliability  
38 coefficient, but will be somewhat inflated compared to using completely independent data. Third,  
39 we trained the final model using the data from all participants, which is what we ultimately used  
40 to test on all other datasets. This model will be the most reliable as it was trained on all available  
41 data. For all tests, we used a forced-choice accuracy procedure to evaluate the performance of  
42 the model. Forced-choice accuracy examines the relative expressions of the model between the  
43 two brain images collected from the same participant and is well suited for fMRI as the input

## Neurometrics-based construct validity of trust

1 images are unlikely to be on the same scale across individuals or scanners<sup>42,45</sup>. We performed  
2 hypothesis tests using permutations in which the labels for each image across participants were  
3 randomly flipped 10,000 times to generate a null distribution. We were only interested in whether  
4 the target condition was significantly greater than the reference condition, so we reported one-  
5 tailed tests. We also computed receiver operator character (ROC) curves using forced choice  
6 accuracy. An interesting property of forced choice accuracy is that it is equivalent to sensitivity,  
7 specificity, and area under the curve (AUC) of the ROC curve.

8  
9 ***Model validation using an independent testing dataset.*** In order to examine the validity of the  
10 trust brain model in an even more rigorous and unbiased way beyond cross-validation, we  
11 evaluated its generalizability to a new test dataset (Dataset 2). This dataset was collected in a  
12 different country (The Netherlands), using a different scanner and variant of the trust game. We  
13 computed forced-choice accuracy on this dataset based on the spatial similarity of the trust model  
14 and each participant's trust and distrust beta images estimated using a first level GLM, and also  
15 calculated an ROC curve to quantify the tradeoff of sensitivity and specificity at different  
16 thresholds (Figure 2B).

## 17 Construct validity and specificity of trust model

18 To evaluate the convergent and discriminant validity of the trust model to other psychological  
19 constructs, we tested our trust classification model on other datasets probing distinct  
20 psychological constructs, including: beliefs of safety (Dataset 3 and 4), negative affect (Dataset 5  
21 and 6), feelings of anticipated reward (Dataset 7, 8 and 9), cognitive control (Dataset 10), social  
22 cognition (Dataset 11 and 12), and self-referential cognition (Dataset 13).

23  
24 For each dataset, we computed the spatial similarity between the trust multivariate brain pattern  
25 and each participant's beta maps representing the test and control conditions from each task. For  
26 example, we evaluated how well the trust model could discriminate between safety and risk in  
27 datasets 3 and 4, neutral and negative emotional experience in dataset 5 and 6, positive and  
28 negative emotional experiences in dataset 6, anticipated reward and loss in dataset 7, anticipated  
29 money gain and loss in dataset 8, anticipated reward and no-reward in dataset 9, success and  
30 failure in cognitive control in dataset 10, familiarity and unfamiliarity in dataset 11, social and non-  
31 social viewing in dataset 12, as well as self and non-self referential cognition in dataset 13. We  
32 followed the same forced-choice testing procedure outlined above. Assessing the generalizability  
33 of the trust model across different datasets in this manner allowed us to demonstrate convergent  
34 and discriminant validity of the trust brain model with other psychological constructs.

## 35 Trust Nomological network

36 Finally, we were interested in assessing the overall spatial similarity between all of the 13 datasets  
37 in order to assess the trust nomological network. We employed both qualitative and quantitative  
38 approaches. First, to qualitatively visualize the similarity of all of the participants from all 13  
39 datasets (N=547), we used Uniform Manifold Approximation and Projection (UMAP), a nonlinear  
40 dimensionality reduction technique (Figure 4A; <https://github.com/lmcinnes/umap>). UMAP  
41 attempts to project high dimensional data into a low dimensional space preserving both local and

## Neurometrics-based construct validity of trust

1 global distance in the feature space using manifold learning<sup>74</sup>. We first removed dataset-specific  
2 differences in brain activity by subtracting the mean brain activity of each dataset from each brain  
3 map, ensuring that mean brain activity of each dataset was the same. We used arbitrarily selected  
4 values for the hyperparameters (number of neighbors = 50, minimal distance = 0.001). Because  
5 the ROI maps contained considerably less features, we used a lower neighbor embedding (Figure  
6 S2; number of neighbors = 15, minimal distance = 0.001). Second, to quantitatively assess the  
7 overall similarity between the datasets, we averaged beta maps across participants for each  
8 condition and computed the spatial similarity across conditions from all datasets in a hierarchical  
9 clustered heatmap (Figure 4B).

10

11

12

## 13 Acknowledgements

14 The authors thank Zhihao Zhang and Ifat Levy for sharing their data and Wasita Mahaphanit for  
15 her comments on the paper. This research was supported by funding from the Chiang Ching-Kuo  
16 Foundation for International Scholarly Exchange (no. GS040-A-16 to P.-H.C.), the Young Scholar  
17 Fellowship Program by the Ministry of Science and Technology (MOST 109-2636-H-002-006 and  
18 110-2636-H-002-004 to P.-H.C.) in Taiwan, National Institute of Health grants (nos.  
19 R01MH116026 and R56MH080716 to L.J.C., R15MH122927 to D.S.F.), the McKnight Foundation  
20 (to M.R.D.), the Netherlands Organization for Scientific Research (NWO; VENI Grant Number  
21 451- 10-021 to B.G.) and the National Science Foundation (NSF CAREER 1848370 to L.J.C.).  
22 Code used to perform the analysis in the paper will be available on github and the trust model will  
23 be uploaded to Neurovault pending publication of this manuscript.

24

25

26

27

## Neurometrics-based construct validity of trust

### 1 Supplementary materials

2  
3  
4  
5

**Table S1.** Basic information of each dataset as well as forced-choice classification accuracy and p values for each generalization testing.

| Dataset number | Number of participants | Construct         | Name of the two conditions     | Accuracy | P value |
|----------------|------------------------|-------------------|--------------------------------|----------|---------|
| 1              | 40                     | Trust             | Trust vs. Distrust             | 90%      | < 0.001 |
| 2              | 17                     | Trust             | Trust vs. Distrust             | 82%      | 0.006   |
| 3              | 15                     | Safety            | Safety vs. Risk                | 93%      | < 0.001 |
| 4              | 123                    | Safety            | Safety vs. Risk                | 93%      | < 0.001 |
| 5              | 93                     | Affect            | Neutral vs. Negative           | 72%      | < 0.001 |
| 6              | 56                     | Affect            | Neutral vs. Negative           | 69%      | 0.002   |
| 6              | 56                     | Affect            | Positive vs. Negative          | 73%      | < 0.001 |
| 6              | 56                     | Affect            | Positive vs. Neutral           | 50%      | 0.551   |
| 7              | 64                     | Reward            | Reward vs. Loss                | 42%      | 0.921   |
| 8              | 18                     | Reward            | Gain vs. Loss                  | 66%      | 0.119   |
| 9              | 29                     | Reward            | Reward vs. No reward           | 38%      | 0.933   |
| 10             | 19                     | Cognitive control | Inhibition success vs. failure | 57%      | 0.326   |
| 11             | 16                     | Social cognition  | Familiar vs. unfamiliar faces  | 63%      | 0.217   |
| 12             | 36                     | Social cognition  | Social vs. nonsocial scenes    | 47%      | 0.686   |
| 13             | 27                     | Social cognition  | Self vs. nonself referential   | 40%      | 0.876   |

6  
7  
8  
  
9  
10  
11

## 1 References

- 2 1. Arrow, K. *The Limits of Organization*. (citeulike.org, 1974).
- 3 2. Dyer, J. H. & Chu, W. The Role of Trustworthiness in Reducing Transaction Costs and  
4 Improving Performance: *Organization Science* **14**, 57–68 (2003).
- 5 3. Sampson, R. J., Raudenbush, S. W. & Earls, F. Neighborhoods and violent crime: a  
6 multilevel study of collective efficacy. *Science* **277**, 918–924 (1997).
- 7 4. Knack, S. & Keefer, P. Does Social Capital Have an Economic Payoff? A Cross-Country  
8 Investigation. *Q. J. Econ.* **112**, 1251–1288 (1997).
- 9 5. Chang, L. The science of trust. (2017).
- 10 6. Simpson, J. A. Psychological Foundations of Trust. *Curr. Dir. Psychol. Sci.* **16**, 264–268  
11 (2007).
- 12 7. Berg, J., Dickhaut, J. & McCabe, K. Trust, Reciprocity, and Social History. *Games Econ.*  
13 *Behav.* **10**, 122–142 (1995).
- 14 8. Dufwenberg, M. & Gneezy, U. Measuring Beliefs in an Experimental Lost Wallet Game.  
15 *Games Econ. Behav.* **30**, 163–182 (2000).
- 16 9. Camerer, C. *Behavioral Game Theory: Experiments in Strategic Interaction*. (Princeton  
17 University Press, 2003).
- 18 10. Phan, K. L., Sripada, C. S., Angstadt, M. & McCabe, K. Reputation for reciprocity engages  
19 the brain reward center. *Proceedings of the National Academy of Sciences* **107**, 13099–  
20 13104 (2010).
- 21 11. McCabe, K., Houser, D., Ryan, L., Smith, V. & Trouard, T. A functional imaging study of  
22 cooperation in two-person reciprocal exchange. *Proc. Natl. Acad. Sci. U. S. A.* **98**, 11832–  
23 11835 (2001).
- 24 12. Fareri, D. S., Chang, L. J. & Delgado, M. R. Computational Substrates of Social Value in  
25 Interpersonal Collaboration. *Journal of Neuroscience* **35**, 8170–8180 (2015).
- 26 13. Delgado, M. R., Frank, R. H. & Phelps, E. A. Perceptions of moral character modulate the  
27 neural systems of reward during the trust game. *Nat. Neurosci.* **8**, 1611–1618 (2005).
- 28 14. Fareri, D. S., Chang, L. J. & Delgado, M. R. Effects of direct social experience on trust  
29 decisions and neural reward circuitry. *Front. Neurosci.* **6**, (2012).
- 30 15. Krajbich, I., Adolphs, R., Tranel, D., Denburg, N. L. & Camerer, C. F. Economic games  
31 quantify diminished sense of guilt in patients with damage to the prefrontal cortex. *J.*  
32 *Neurosci.* **29**, 2188–2192 (2009).
- 33 16. King-Casas, B. *et al.* Getting to know you: reputation and trust in a two-person economic  
34 exchange. *Science* **308**, 78–83 (2005).
- 35 17. King-Casas, B. *et al.* The rupture and repair of cooperation in borderline personality  
36 disorder. *Science* **321**, 806–810 (2008).
- 37 18. Fouragnan, E. *et al.* Reputational priors magnify striatal responses to violations of trust. *J.*  
38 *Neurosci.* **33**, 3602–3611 (2013).
- 39 19. Chang, L. J., Smith, A., Dufwenberg, M. & Sanfey, A. G. Triangulating the neural,  
40 psychological, and economic bases of guilt aversion. *Neuron* **70**, 560–572 (2011).
- 41 20. van Baar, J. M., Chang, L. J. & Sanfey, A. G. The computational and neural substrates of  
42 moral strategies in social decision-making. *Nat. Commun.* **10**, 1483 (2019).
- 43 21. Frank, R. H., Gilovich, T. & Regan, D. T. The evolution of one-shot cooperation: An  
44 experiment. *Ethol. Sociobiol.* **14**, 247–256 (1993).
- 45 22. Jolly, E. & Chang, L. J. Gossip drives vicarious learning and facilitates robust social  
46 connections. (2018) doi:10.31234/osf.io/qau5s.
- 47 23. Feinberg, M., Willer, R. & Schultz, M. Gossip and ostracism promote cooperation in groups.  
48 *Psychol. Sci.* **25**, 656–664 (2014).
- 49 24. Sommerfeld, R. D., Krambeck, H.-J., Semmann, D. & Milinski, M. Gossip as an alternative

## Neurometrics-based construct validity of trust

- 1 for direct observation in games of indirect reciprocity. *Proc. Natl. Acad. Sci. U. S. A.* **104**,  
2 17435–17440 (2007).
- 3 25. Stanley, D. A., Sokol-Hessner, P., Banaji, M. R. & Phelps, E. A. Implicit race attitudes  
4 predict trustworthiness judgments and economic trust decisions. *Proc. Natl. Acad. Sci. U.*  
5 *S. A.* **108**, 7710–7715 (2011).
- 6 26. Scharlemann, J. P. W., Eckel, C. C., Kacelnik, A. & Wilson, R. K. The value of a smile:  
7 Game theory with a human face. *J. Econ. Psychol.* **22**, 617–640 (2001).
- 8 27. van 't Wout, M. & Sanfey, A. G. Friend or foe: the effect of implicit trustworthiness  
9 judgments in social decision-making. *Cognition* **108**, 796–803 (2008).
- 10 28. Scanzoni, J. Social exchange and behavioral interdependence. *Social exchange in*  
11 *developing relationships* 61–98 (1979).
- 12 29. Rousseau, D. M., Sitkin, S. B., Burt, R. S. & Camerer, C. Not So Different After All: A  
13 Cross-Discipline View Of Trust. *Acad. Manage. Rev.* **23**, 393–404 (1998).
- 14 30. Chang, L. J., Doll, B. B., van't Wout, M., Frank, M. J. & Sanfey, A. G. Seeing is believing:  
15 Trustworthiness as a dynamic belief. *Cogn. Psychol.* **61**, 87–105 (2010).
- 16 31. Rilling, J. *et al.* A neural basis for social cooperation. *Neuron* **35**, 395–405 (2002).
- 17 32. Kishida, K. T. & Montague, P. R. Imaging models of valuation during social interaction in  
18 humans. *Biol. Psychiatry* **72**, 93–100 (2012).
- 19 33. Tabibnia, G., Satpute, A. B. & Lieberman, M. D. The Sunny Side of Fairness: Preference  
20 for Fairness Activates Reward Circuitry (and Disregarding Unfairness Activates Self-Control  
21 Circuitry). *Psychol. Sci.* **19**, 339–347 (2008).
- 22 34. Bohnet, I. & Zeckhauser, R. Trust, risk and betrayal. *J. Econ. Behav. Organ.* **55**, 467–484  
23 (2004).
- 24 35. Cronbach, L. J. & Meehl, P. E. Construct validity in psychological tests. *Psychol. Bull.* **52**,  
25 281–302 (1955).
- 26 36. Campbell, D. T. & Fiske, D. W. Convergent and discriminant validation by the multitrait-  
27 multimethod matrix. *Psychol. Bull.* **56**, 81–105 (1959).
- 28 37. Woo, C.-W., Chang, L. J., Lindquist, M. A. & Wager, T. D. Building better biomarkers: brain  
29 models in translational neuroimaging. *Nat. Neurosci.* **20**, 365–377 (2017).
- 30 38. Poldrack, R. A., Halchenko, Y. O. & Hanson, S. J. Decoding the large-scale structure of  
31 brain function by classifying mental States across individuals. *Psychol. Sci.* **20**, 1364–1372  
32 (2009).
- 33 39. Yarkoni, T., Poldrack, R. A., Nichols, T. E., Van Essen, D. C. & Wager, T. D. Large-scale  
34 automated synthesis of human functional neuroimaging data. *Nat. Methods* **8**, 665–670  
35 (2011).
- 36 40. Chang, L. J., Yarkoni, T., Khaw, M. W. & Sanfey, A. G. Decoding the role of the insula in  
37 human cognition: functional parcellation and large-scale reverse inference. *Cereb. Cortex*  
38 **23**, 739–749 (2013).
- 39 41. Kragel, P. A. *et al.* Generalizable representations of pain, cognitive control, and negative  
40 emotion in medial frontal cortex. *Nat. Neurosci.* **21**, 283–289 (2018).
- 41 42. Wager, T. D. *et al.* An fMRI-based neurologic signature of physical pain. *N. Engl. J. Med.*  
42 **368**, 1388–1397 (2013).
- 43 43. Krishnan, A. *et al.* Somatic and vicarious pain are represented by dissociable multivariate  
44 brain patterns. *Elife* **5**, (2016).
- 45 44. Eisenbarth, H., Chang, L. J. & Wager, T. D. Multivariate Brain Prediction of Heart Rate and  
46 Skin Conductance Responses to Social Threat. *J. Neurosci.* **36**, 11987–11998 (2016).
- 47 45. Chang, L. J., Gianaros, P. J., Manuck, S. B., Krishnan, A. & Wager, T. D. A Sensitive and  
48 Specific Neural Signature for Picture-Induced Negative Affect. *PLoS Biol.* **13**, e1002180  
49 (2015).
- 50 46. Yu, H. *et al.* A Generalizable Multivariate Brain Pattern for Interpersonal Guilt. *Cereb.*  
51 *Cortex* **30**, 3558–3572 (2020).

## Neurometrics-based construct validity of trust

- 1 47. Nishimoto, S. *et al.* Reconstructing visual experiences from brain activity evoked by natural  
2 movies. *Curr. Biol.* **21**, 1641–1646 (2011).
- 3 48. Huth, A. G. *et al.* Decoding the Semantic Content of Natural Movies from Human Brain  
4 Activity. *Front. Syst. Neurosci.* **10**, 81 (2016).
- 5 49. Gorgolewski, K., Esteban, O., Schaefer, G., Wandell, B. & Poldrack, R. OpenNeuro—a free  
6 online platform for sharing and analysis of neuroimaging data. *Organization for human  
7 brain mapping. Vancouver, Canada* **1677**, (2017).
- 8 50. Gorgolewski, K. J. *et al.* NeuroVault.org: a web-based repository for collecting and sharing  
9 unthresholded statistical maps of the human brain. *Front. Neuroinform.* **9**, 8 (2015).
- 10 51. Yarkoni, T., Poldrack, R. A., Van Essen, D. C. & Wager, T. D. Cognitive neuroscience 2.0:  
11 building a cumulative science of human brain function. *Trends Cogn. Sci.* **14**, 489–496  
12 (2010).
- 13 52. Poldrack, R. A. & Gorgolewski, K. J. Making big data open: data sharing in neuroimaging.  
14 *Nat. Neurosci.* **17**, 1510–1517 (2014).
- 15 53. Gorgolewski, K. J. *et al.* The brain imaging data structure, a format for organizing and  
16 describing outputs of neuroimaging experiments. *Sci Data* **3**, 160044 (2016).
- 17 54. Woo, C.-W. *et al.* Separate neural representations for physical pain and social rejection.  
18 *Nat. Commun.* **5**, 5380 (2014).
- 19 55. Schreuders, E., Klapwijk, E. T., Will, G.-J. & Güroğlu, B. Friend versus foe: Neural  
20 correlates of prosocial decisions for liked and disliked peers. *Cogn. Affect. Behav.*  
21 *Neurosci.* **18**, 127–142 (2018).
- 22 56. Schonberg, T. *et al.* Decreasing ventromedial prefrontal cortex activity during sequential  
23 risk-taking: an fMRI investigation of the balloon analog risk task. *Front. Neurosci.* **6**, (2012).
- 24 57. Poldrack, R. A. *et al.* A phenome-wide examination of neural and cognitive function. *Sci*  
25 *Data* **3**, 160110 (2016).
- 26 58. Chen, P.-H. A. & Wu, Y.-J. C. Uncovering the association between individual variations in  
27 self-awareness and brain emotional reactivity by intersubject representational analysis. *in*  
28 *preparation*.
- 29 59. Barch, D. M. *et al.* Function in the human connectome: Task-fMRI and individual  
30 differences in behavior. *Neuroimage* **80**, 169–189 (2013).
- 31 60. Zhang, Z. *et al.* Distributed neural representation of saliency controlled value and category  
32 during anticipation of rewards and punishments. *Nat. Commun.* **8**, 447 xii (2017).
- 33 61. Tomova, L. *et al.* Acute social isolation evokes midbrain craving responses similar to  
34 hunger. *Nat. Neurosci.* (2020) doi:10.1101/2020.03.25.006643.
- 35 62. Xue, G., Aron, A. R. & Poldrack, R. A. Common neural substrates for inhibition of spoken  
36 and manual responses. *Cereb. Cortex* **18**, 1923–1932 (2008).
- 37 63. Wakeman, D. G. & Henson, R. N. A multi-subject, multi-modal human neuroimaging  
38 dataset. *Sci Data* **2**, 150001 (2015).
- 39 64. Chen, P.-H. A., Kelley, W. M., Lopez, R. B. & Heatherton, T. F. Reducing reward  
40 responsivity and daily food desires in female dieters through domain-specific training. *Soc.*  
41 *Neurosci.* **14**, 470–483 (2019).
- 42 65. Chen, P.-H. A., Wagner, D. D., Kelley, W. M. & Heatherton, T. F. Activity in cortical midline  
43 structures is modulated by self-construal changes during acculturation. *Culture and Brain* **3**,  
44 39–52 (2015).
- 45 66. Chen, P.-H. A., Wagner, D. D., Kelley, W. M., Powers, K. E. & Heatherton, T. F. Medial  
46 prefrontal cortex differentiates self from mother in Chinese: evidence from self-motivated  
47 immigrants. *Culture and Brain* **1**, 3–15 (2013).
- 48 67. Jolly, E. & Chang, L. J. Multivariate Spatial Feature Selection in fMRI. *Soc. Cogn. Affect.*  
49 *Neurosci.* (2021) doi:10.1093/scan/nsab010.
- 50 68. Krueger, F. *et al.* Neural correlates of trust. *Proceedings of the National Academy of*  
51 *Sciences* **104**, 20084–20089 (2007).



## Neurometrics-based construct validity of trust

- 1 69. Geier, C. F., Terwilliger, R., Teslovich, T., Velanova, K. & Luna, B. Immaturities in reward  
2 processing and its influence on inhibitory control in adolescence. *Cereb. Cortex* **20**, 1613–  
3 1629 (2010).
- 4 70. Delgado, M. R., Nystrom, L. E., Fissell, C., Noll, D. C. & Fiez, J. A. Tracking the  
5 hemodynamic responses to reward and punishment in the striatum. *J. Neurophysiol.* **84**,  
6 3072–3077 (2000).
- 7 71. Knutson, B., Westdorp, A., Kaiser, E. & Hommer, D. fMRI visualization of brain activity  
8 during a monetary incentive delay task. *Neuroimage* **12**, 20–27 (2000).
- 9 72. Venkatraman, V., Payne, J. W., Bettman, J. R., Luce, M. F. & Huettel, S. A. Separate  
10 neural mechanisms underlie choices and strategic preferences in risky decision making.  
11 *Neuron* **62**, 593–602 (2009).
- 12 73. Rand, D. G., Greene, J. D. & Nowak, M. A. Spontaneous giving and calculated greed.  
13 *Nature* **489**, 427–430 (2012).
- 14 74. McInnes, L., Healy, J. & Melville, J. UMAP: Uniform Manifold Approximation and Projection  
15 for Dimension Reduction. *arXiv [stat.ML]* (2018).
- 16 75. Kriegeskorte, N. & Douglas, P. K. Interpreting encoding and decoding models. *Curr. Opin.*  
17 *Neurobiol.* **55**, 167–179 (2019).
- 18 76. Sul, S. *et al.* Spatial gradient in value representation along the medial prefrontal cortex  
19 reflects individual differences in prosociality. *Proc. Natl. Acad. Sci. U. S. A.* **112**, 7851–7856  
20 (2015).
- 21 77. Haufe, S. *et al.* On the interpretation of weight vectors of linear models in multivariate  
22 neuroimaging. *Neuroimage* **87**, 96–110 (2014).
- 23 78. Jolly, E. & Chang, L. J. Multivariate spatial feature selection in fMRI. *osf.io*.
- 24 79. Chen, P.-H. A., Jolly, E., Cheong, J. H. & Chang, L. J. Intersubject representational  
25 similarity analysis reveals individual variations in affective experience when watching erotic  
26 movies. *Neuroimage* **216**, 116851 (2020).
- 27 80. Finn, E. S. *et al.* Idiosyncrony: From shared responses to individual differences during  
28 naturalistic neuroimaging. *Neuroimage* **215**, 116828 (2020).
- 29 81. Jolly, E. & Chang, L. J. The Flatland Fallacy: Moving Beyond Low-Dimensional Thinking.  
30 *Top. Cogn. Sci.* (2019).
- 31 82. Poldrack, R. A. Can cognitive processes be inferred from neuroimaging data? *Trends*  
32 *Cogn. Sci.* **10**, 59–63 (2006).
- 33 83. Misaki, M., Kim, Y., Bandettini, P. A. & Kriegeskorte, N. Comparison of multivariate  
34 classifiers and response normalizations for pattern-information fMRI. *Neuroimage* **53**, 103–  
35 118 (2010).
- 36 84. Gorgolewski, K. J., Durnez, J. & Poldrack, R. A. Preprocessed Consortium for  
37 Neuropsychiatric Phenomics dataset. *F1000Res.* **6**, 1262 (2017).
- 38 85. Gianaros, P. J. *et al.* An inflammatory pathway links atherosclerotic cardiovascular disease  
39 risk to neural activity evoked by the cognitive regulation of emotion. *Biol. Psychiatry* **75**,  
40 738–745 (2014).
- 41 86. Wagner, D. D. & Heatherton, T. F. Self-regulatory depletion increases emotional reactivity  
42 in the amygdala. *Soc. Cogn. Affect. Neurosci.* **8**, 410–417 (2012).
- 43 87. Glasser, M. F. *et al.* The minimal preprocessing pipelines for the Human Connectome  
44 Project. *Neuroimage* **80**, 105–124 (2013).
- 45 88. Krebs, R. M., Heipertz, D., Schuetze, H. & Duzel, E. Novelty increases the mesolimbic  
46 functional connectivity of the substantia nigra/ventral tegmental area (SN/VTA) during  
47 reward anticipation: Evidence from high-resolution fMRI. *Neuroimage* **58**, 647–655 (2011).
- 48 89. Esteban, O. *et al.* fMRIPrep: a robust preprocessing pipeline for functional MRI. *Nat.*  
49 *Methods* **16**, 111–116 (2019).
- 50 90. Powers, K. E., Wagner, D. D., Norris, C. J. & Heatherton, T. F. Socially excluded individuals  
51 fail to recruit medial prefrontal cortex for negative social scenes. *Soc. Cogn. Affect.*

## Neurometrics-based construct validity of trust

- 1        *Neurosci.* (2011).
- 2    91. Wagner, D. D., Boswell, R. G., Kelley, W. M. & Heatherton, T. F. Inducing Negative Affect
- 3        Increases the Reward Value of Appetizing Foods in Dieters. *J. Cogn. Neurosci.* **24**, 1625–
- 4        1633 (2012).
- 5    92. Wagner, D. D., Altman, M., Boswell, R. G., Kelley, W. M. & Heatherton, T. F. Self-
- 6        Regulatory Depletion Enhances Neural Responses to Rewards and Impairs Top-Down
- 7        Control. *Psychol. Sci.* **24**, 2262–2271 (2013).

8
